# Supplementary material for: Edible Flowers of Tagetes erecta L. as Functional Ingredients: Phenolic Composition, Antioxidant and Protective Effects on Caenorhabditis elegans
Source: Nutrients. 2018 Dec 18;10(12):2002. doi: 10.3390/nu10122002 (PMC6316237; doi:10.3390/nu10122002)
Supplement: Supplementary file 1 [file nutrients-10-02002-s001.pdf]

**Table S1.** Effects of orange cultivar of *T. erecta* flowers extracts on the viability of wild-type *C. elegans*. The results are presented as mean of % viability  $\pm$ SEM. Not significance differences between treatment and control groups were found ( $p > 0.05$ ).

| Concentration<br>( $\mu\text{g/mL}$ ) | Orange Cultivar | <i>p</i> -Value |
|---------------------------------------|-----------------|-----------------|
| Control                               | 90 $\pm$ 2      |                 |
| 2000                                  | 91 $\pm$ 2      | >0.05           |
| 1000                                  | 89 $\pm$ 3      | >0.05           |
| 750                                   | 91 $\pm$ 2      | >0.05           |
| 500                                   | 96 $\pm$ 2      | >0.05           |
| 250                                   | 93 $\pm$ 1      | >0.05           |
| 100                                   | 92 $\pm$ 2      | >0.05           |
| 50                                    | 89 $\pm$ 2      | >0.05           |

**Table S2.** Effects of yellow variety of *T. erecta* flowers extracts on the viability of wild-type *C. elegans*. The results are presented as mean of % viability  $\pm$ SEM. Not significance differences between treatment and control groups were found ( $p > 0.05$ ).

| Concentration<br>( $\mu\text{g/mL}$ ) | Yellow Cultivar | <i>p</i> -value |
|---------------------------------------|-----------------|-----------------|
| Control                               | 93 $\pm$ 2      |                 |
| 2000                                  | 96 $\pm$ 2      | >0.05           |
| 1000                                  | 96 $\pm$ 2      | >0.05           |
| 750                                   | 96 $\pm$ 2      | >0.05           |
| 500                                   | 93 $\pm$ 3      | >0.05           |
| 250                                   | 90 $\pm$ 3      | >0.05           |
| 100                                   | 90 $\pm$ 2      | >0.05           |
| 50                                    | 91 $\pm$ 2      | >0.05           |
